# Supplementary material
Source: PubMed Central journal article supplement (PMC1383645)
Supplement: plntcell_tpc.105.037978_6.pdf [file plntcell_tpc.105.037978_6.pdf]

**Sequences of primers mentioned in Material and Methods:**

VHA-a1.XcmI.FOR:  
CCTTTCCACATCTTTGGTGGTTCAGC

VHA-a1-KpnI-SpeI.REV:  
ATATACTAGTGGTACCTGATTAAAGCGAAAGAGAAAGGC

VHA-a2-XbaI.FOR:  
GCAAGTTCTAGATGCTAAACC

VHA-a2-KpnI.REV:  
ATATGGTACCTCTCGTCTTCGTTTCCGACGAGAG

VHA-a3-PstI.FOR:  
GAACTCTACTCTGCAGTGTGGC

VHA-a3-KpnI.REV:  
ATATGGTACCTCTCGTCTTCGTTTGCCGTG

a2-a1.for:  
CCAACTCTGGGGAGAAGGTTAG

a2-KpnISpeI.REV:  
ATATACTAGTGGTACCTCTCGTCTTCGTTTCCGACGAGAG

a1RT.FOR:  
GTATGAAAACATTTTGATCCG

a1RT.REV:  
GAG GAG TTA CCG TAT AAT GAG

GFP.REV:  
TGC CCA TTA ACA TCA CCA TC
