# Supplementary material
Source: PubMed Central journal article supplement (PMC1383645)

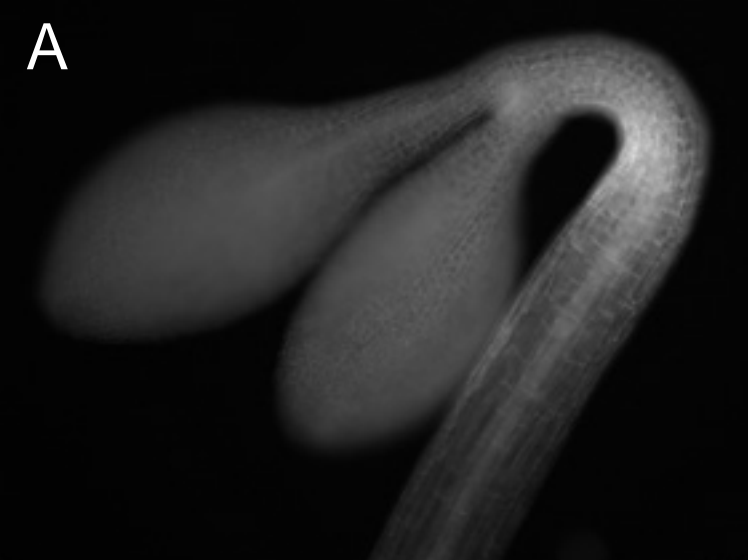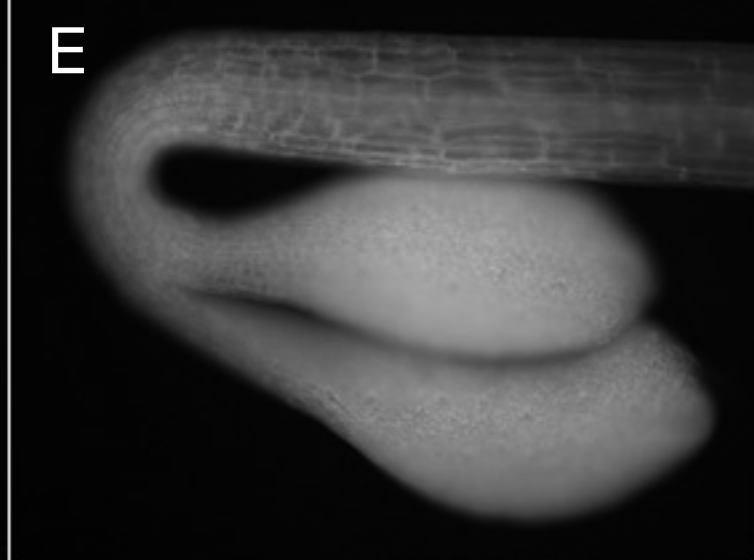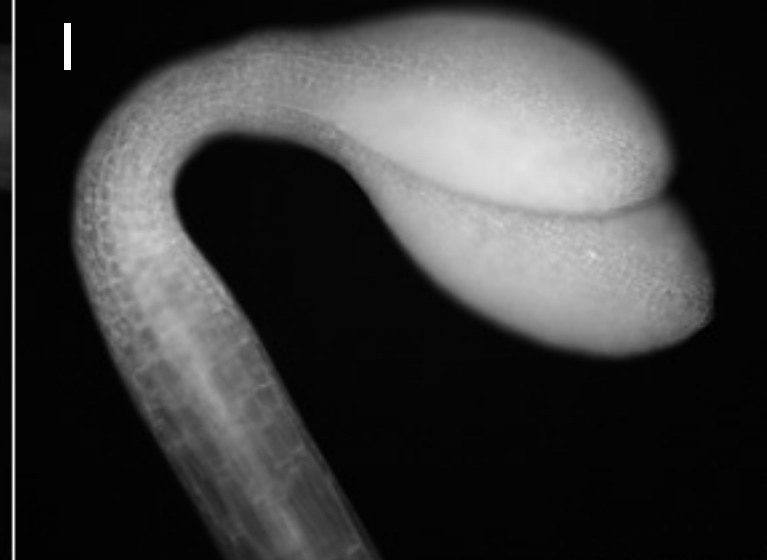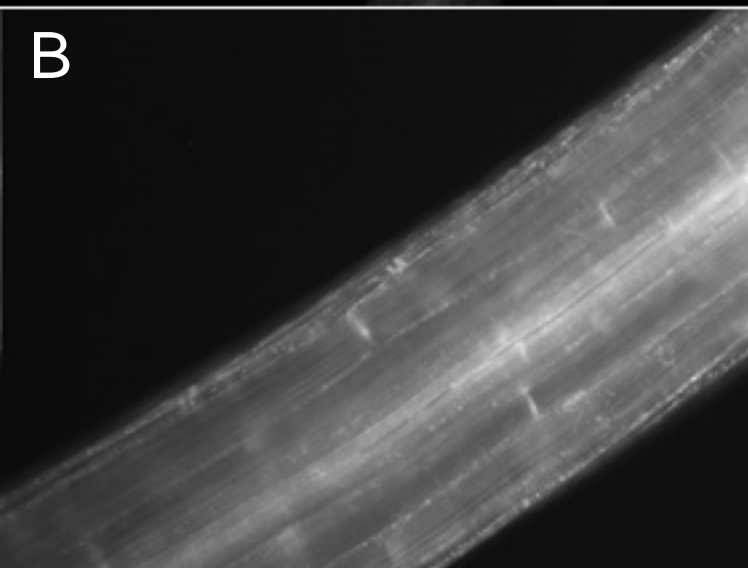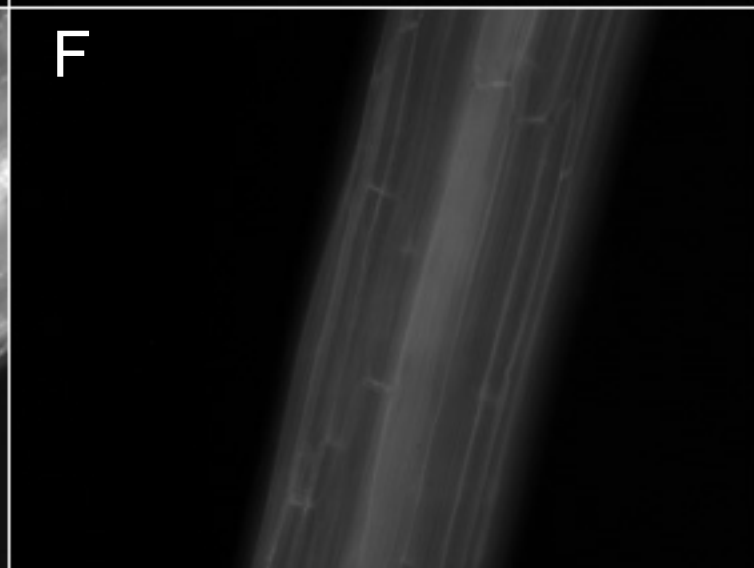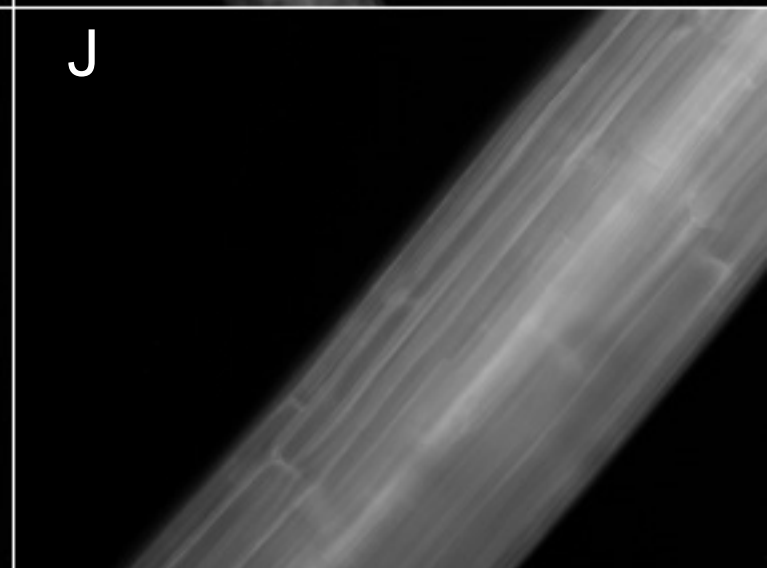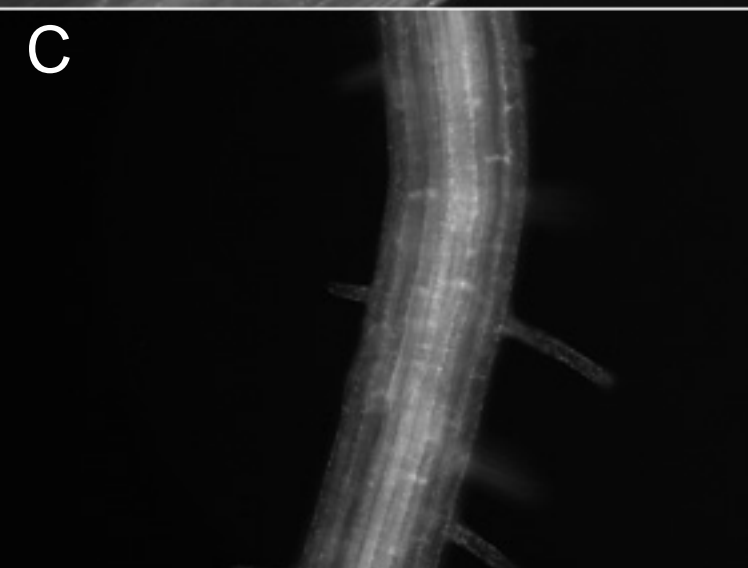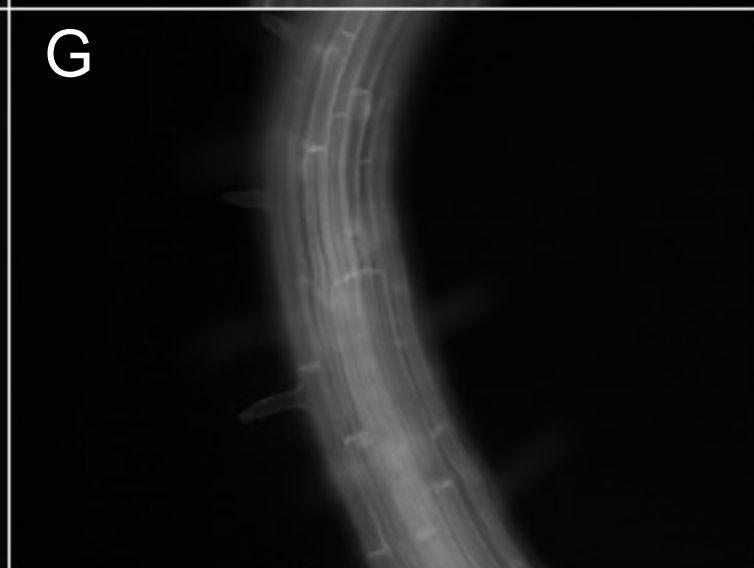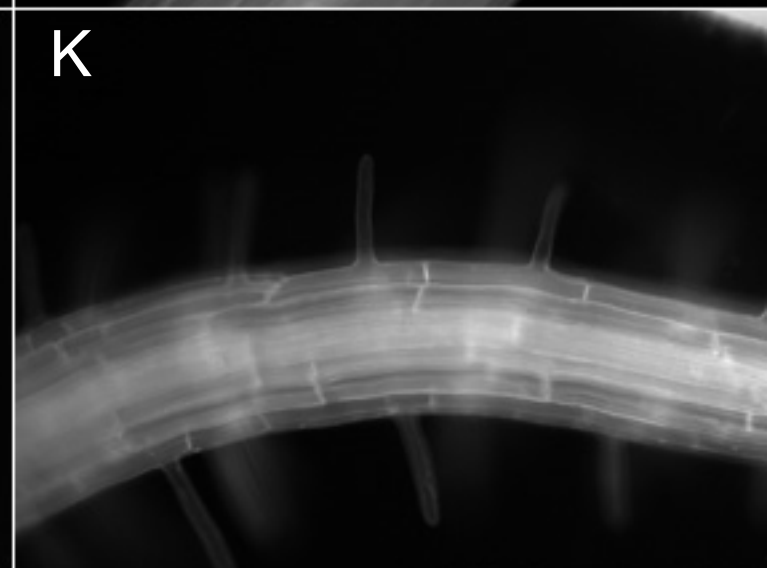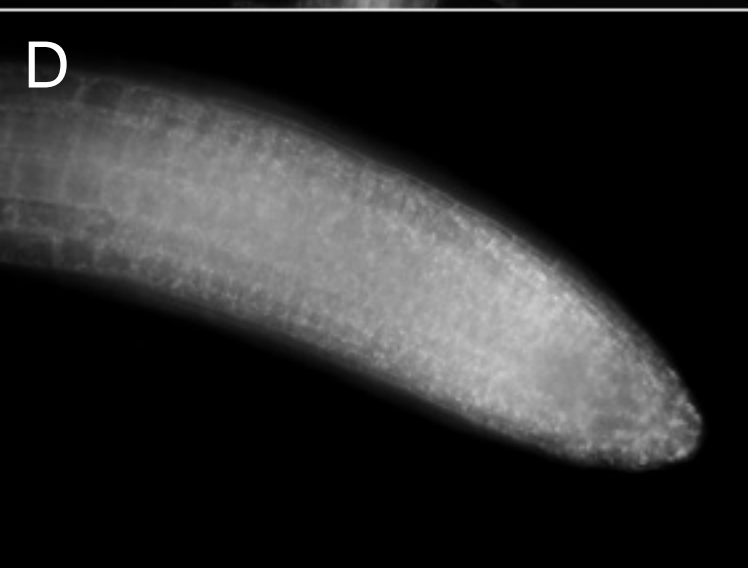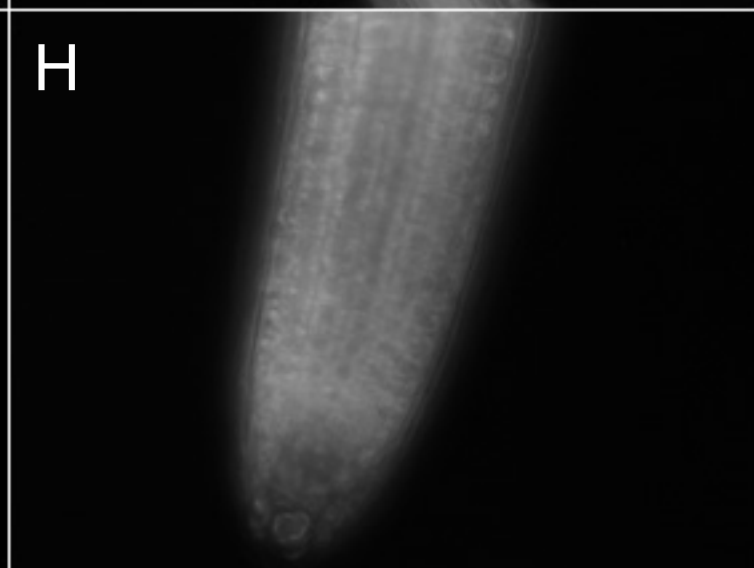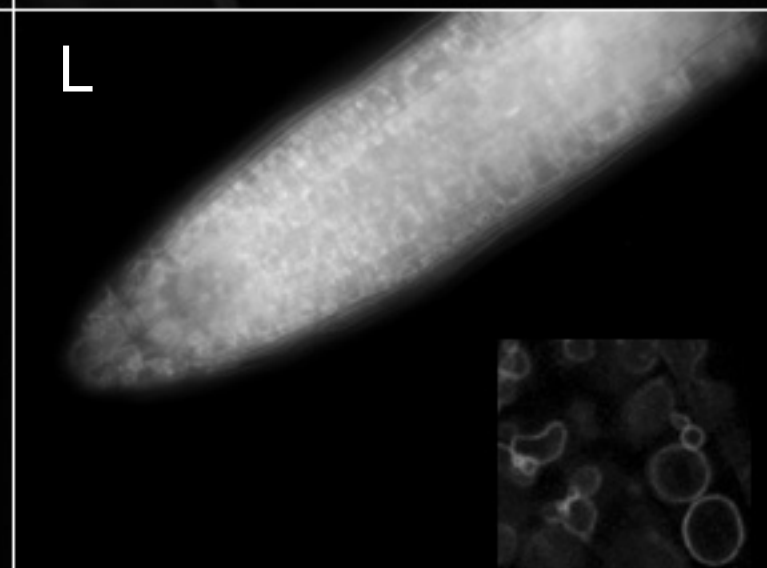

Supplement: plntcell_tpc.105.037978_2.pdf [file plntcell_tpc.105.037978_2.pdf]

# SYP41-GFP+SYP41mRFP

A

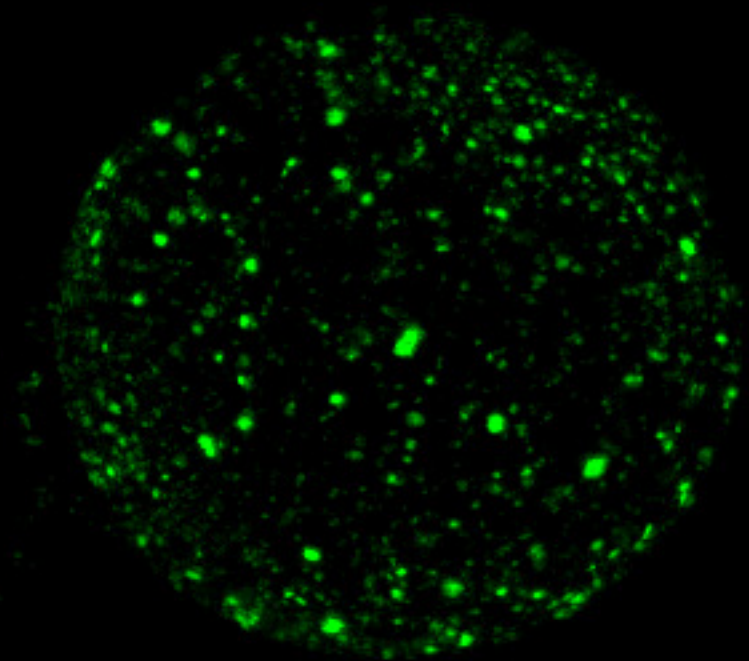

B

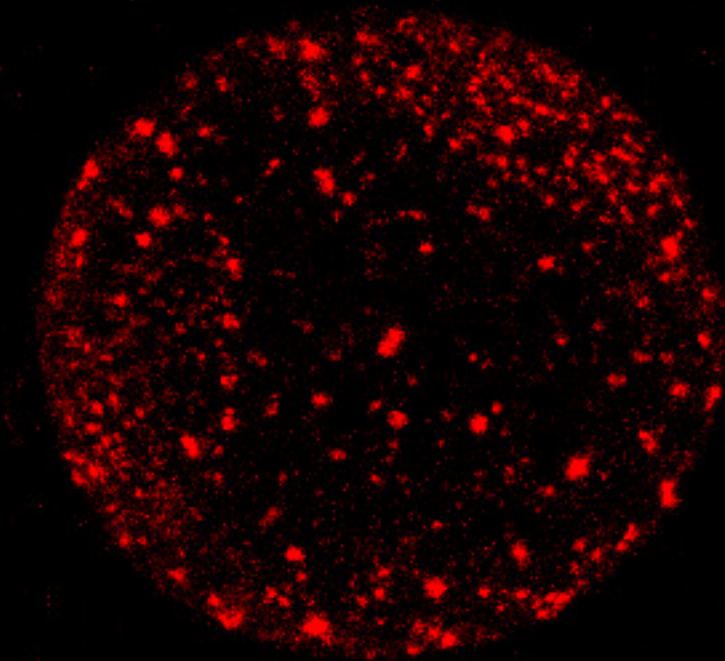

C

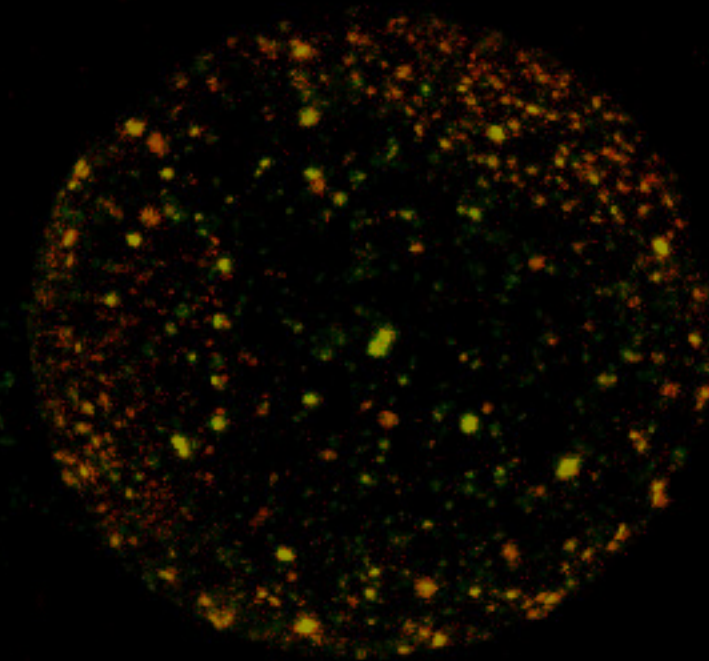

Supplement: plntcell_tpc.105.037978_3.pdf [file plntcell_tpc.105.037978_3.pdf]

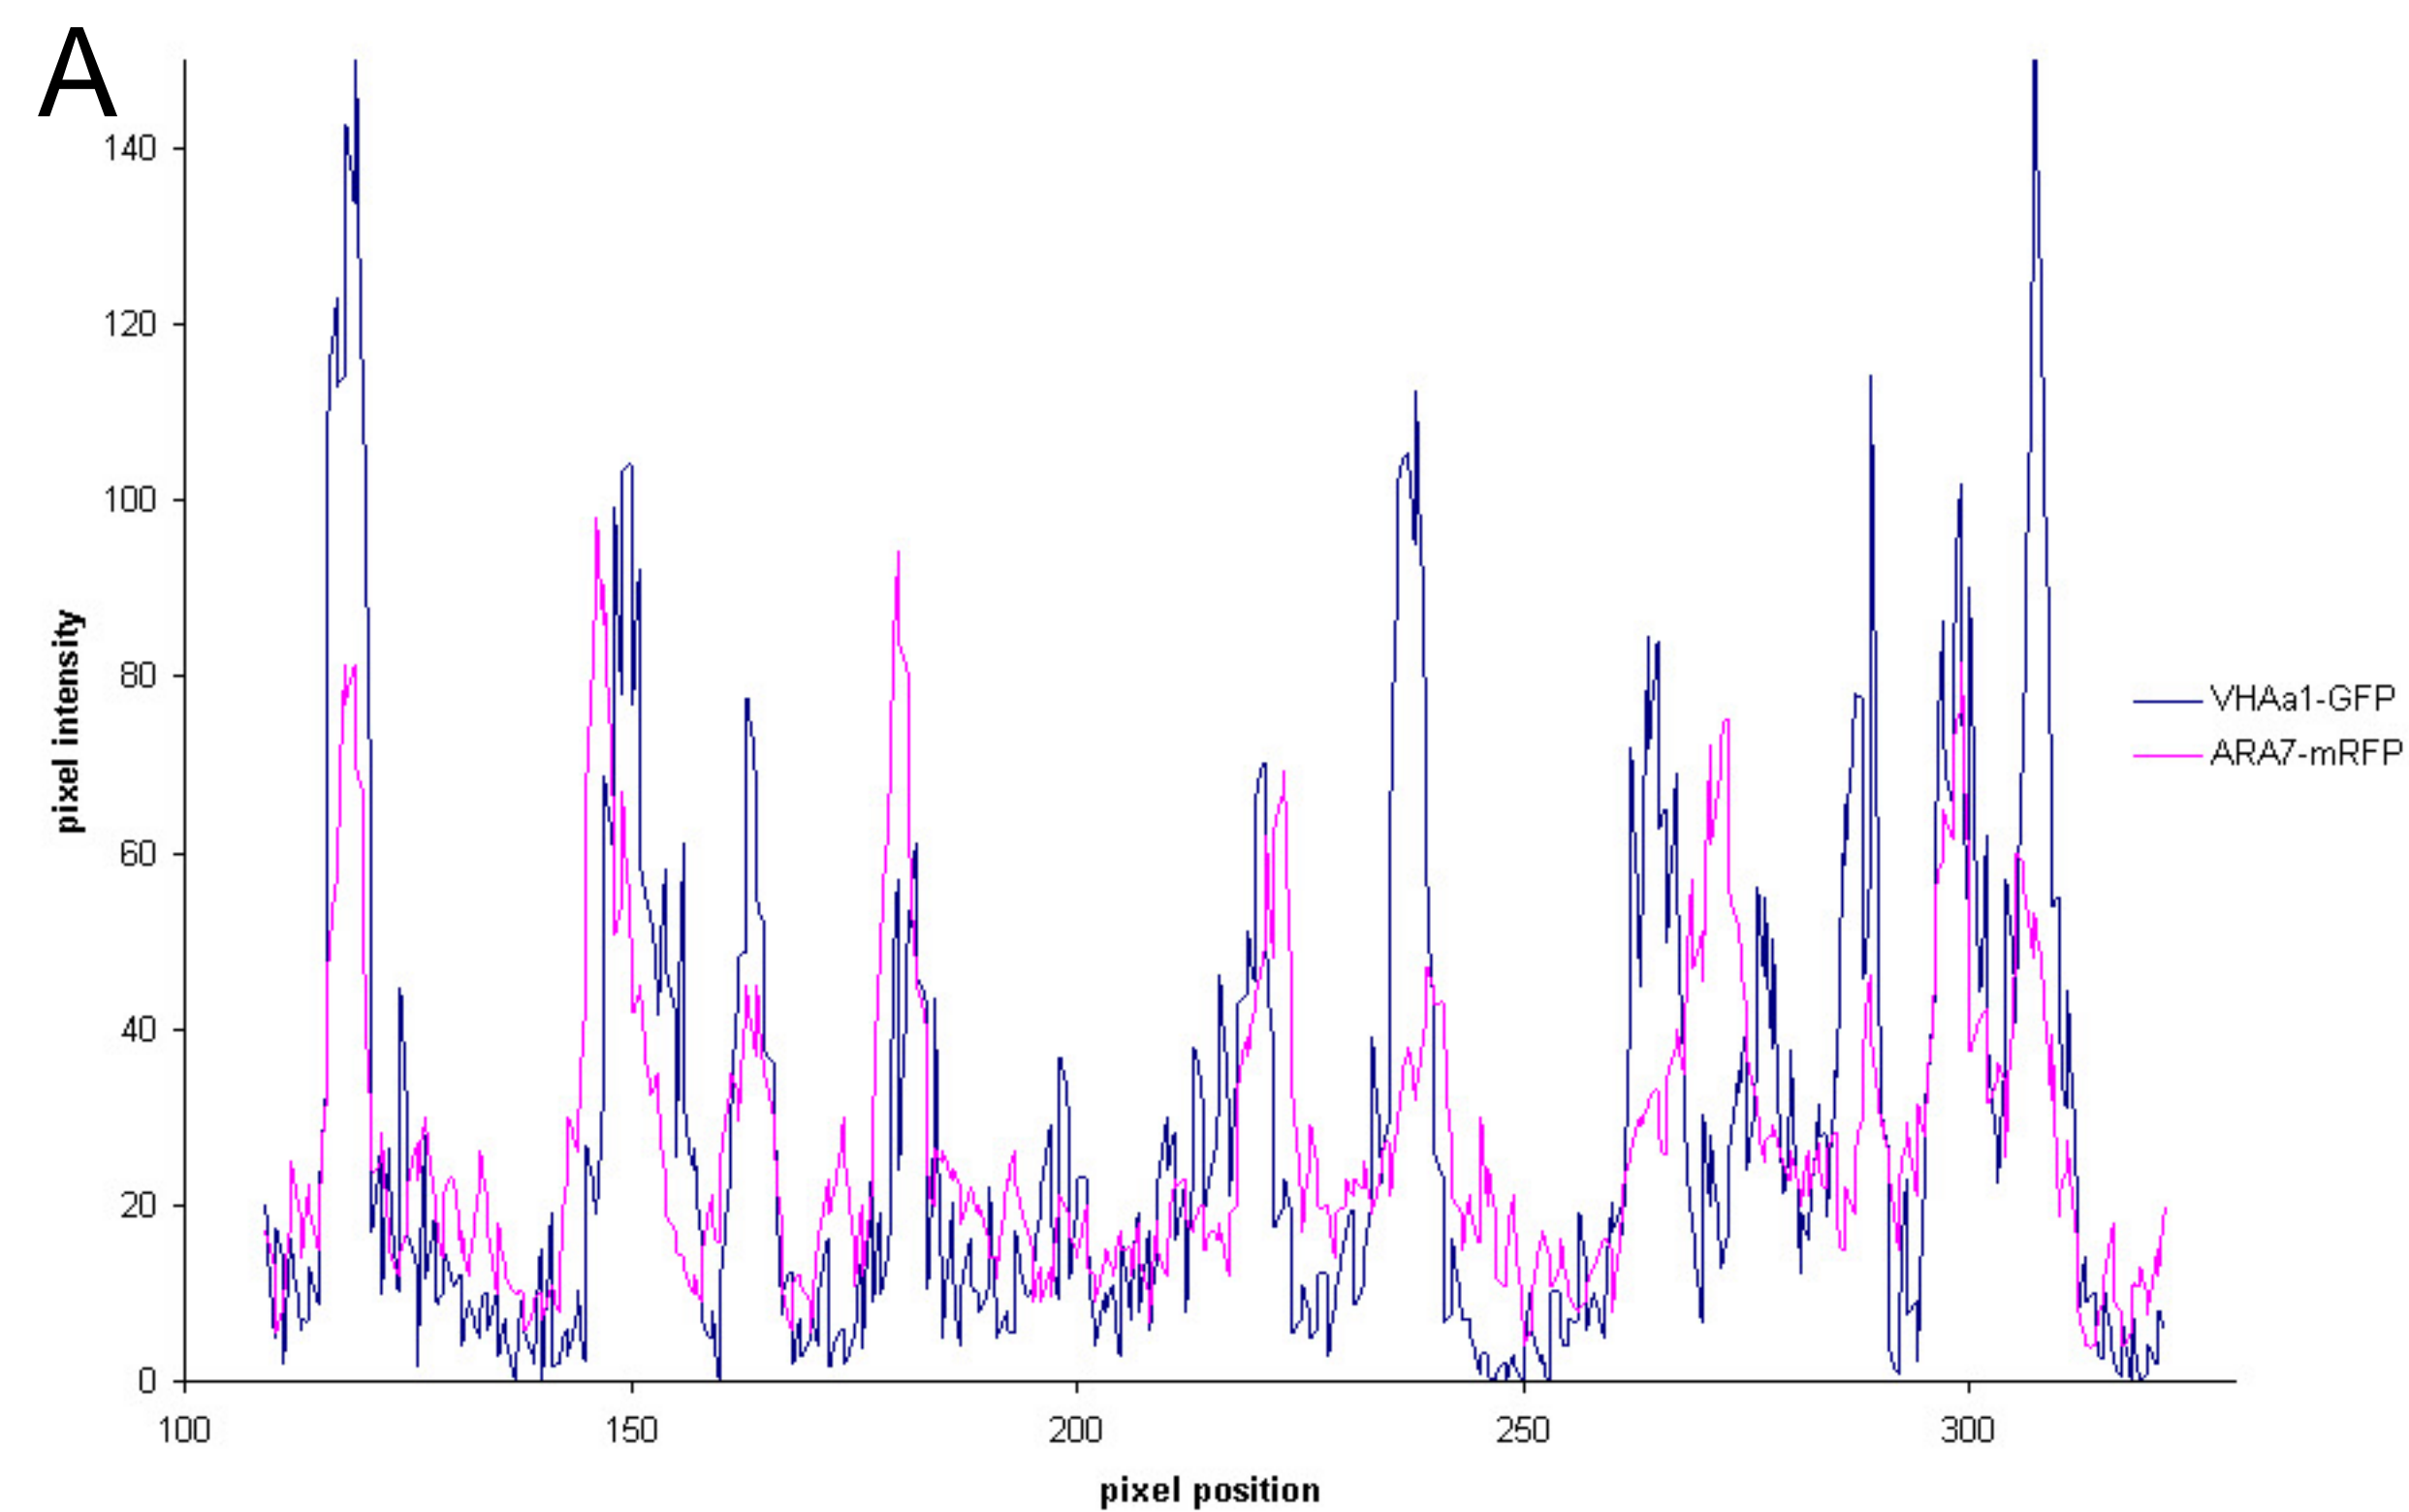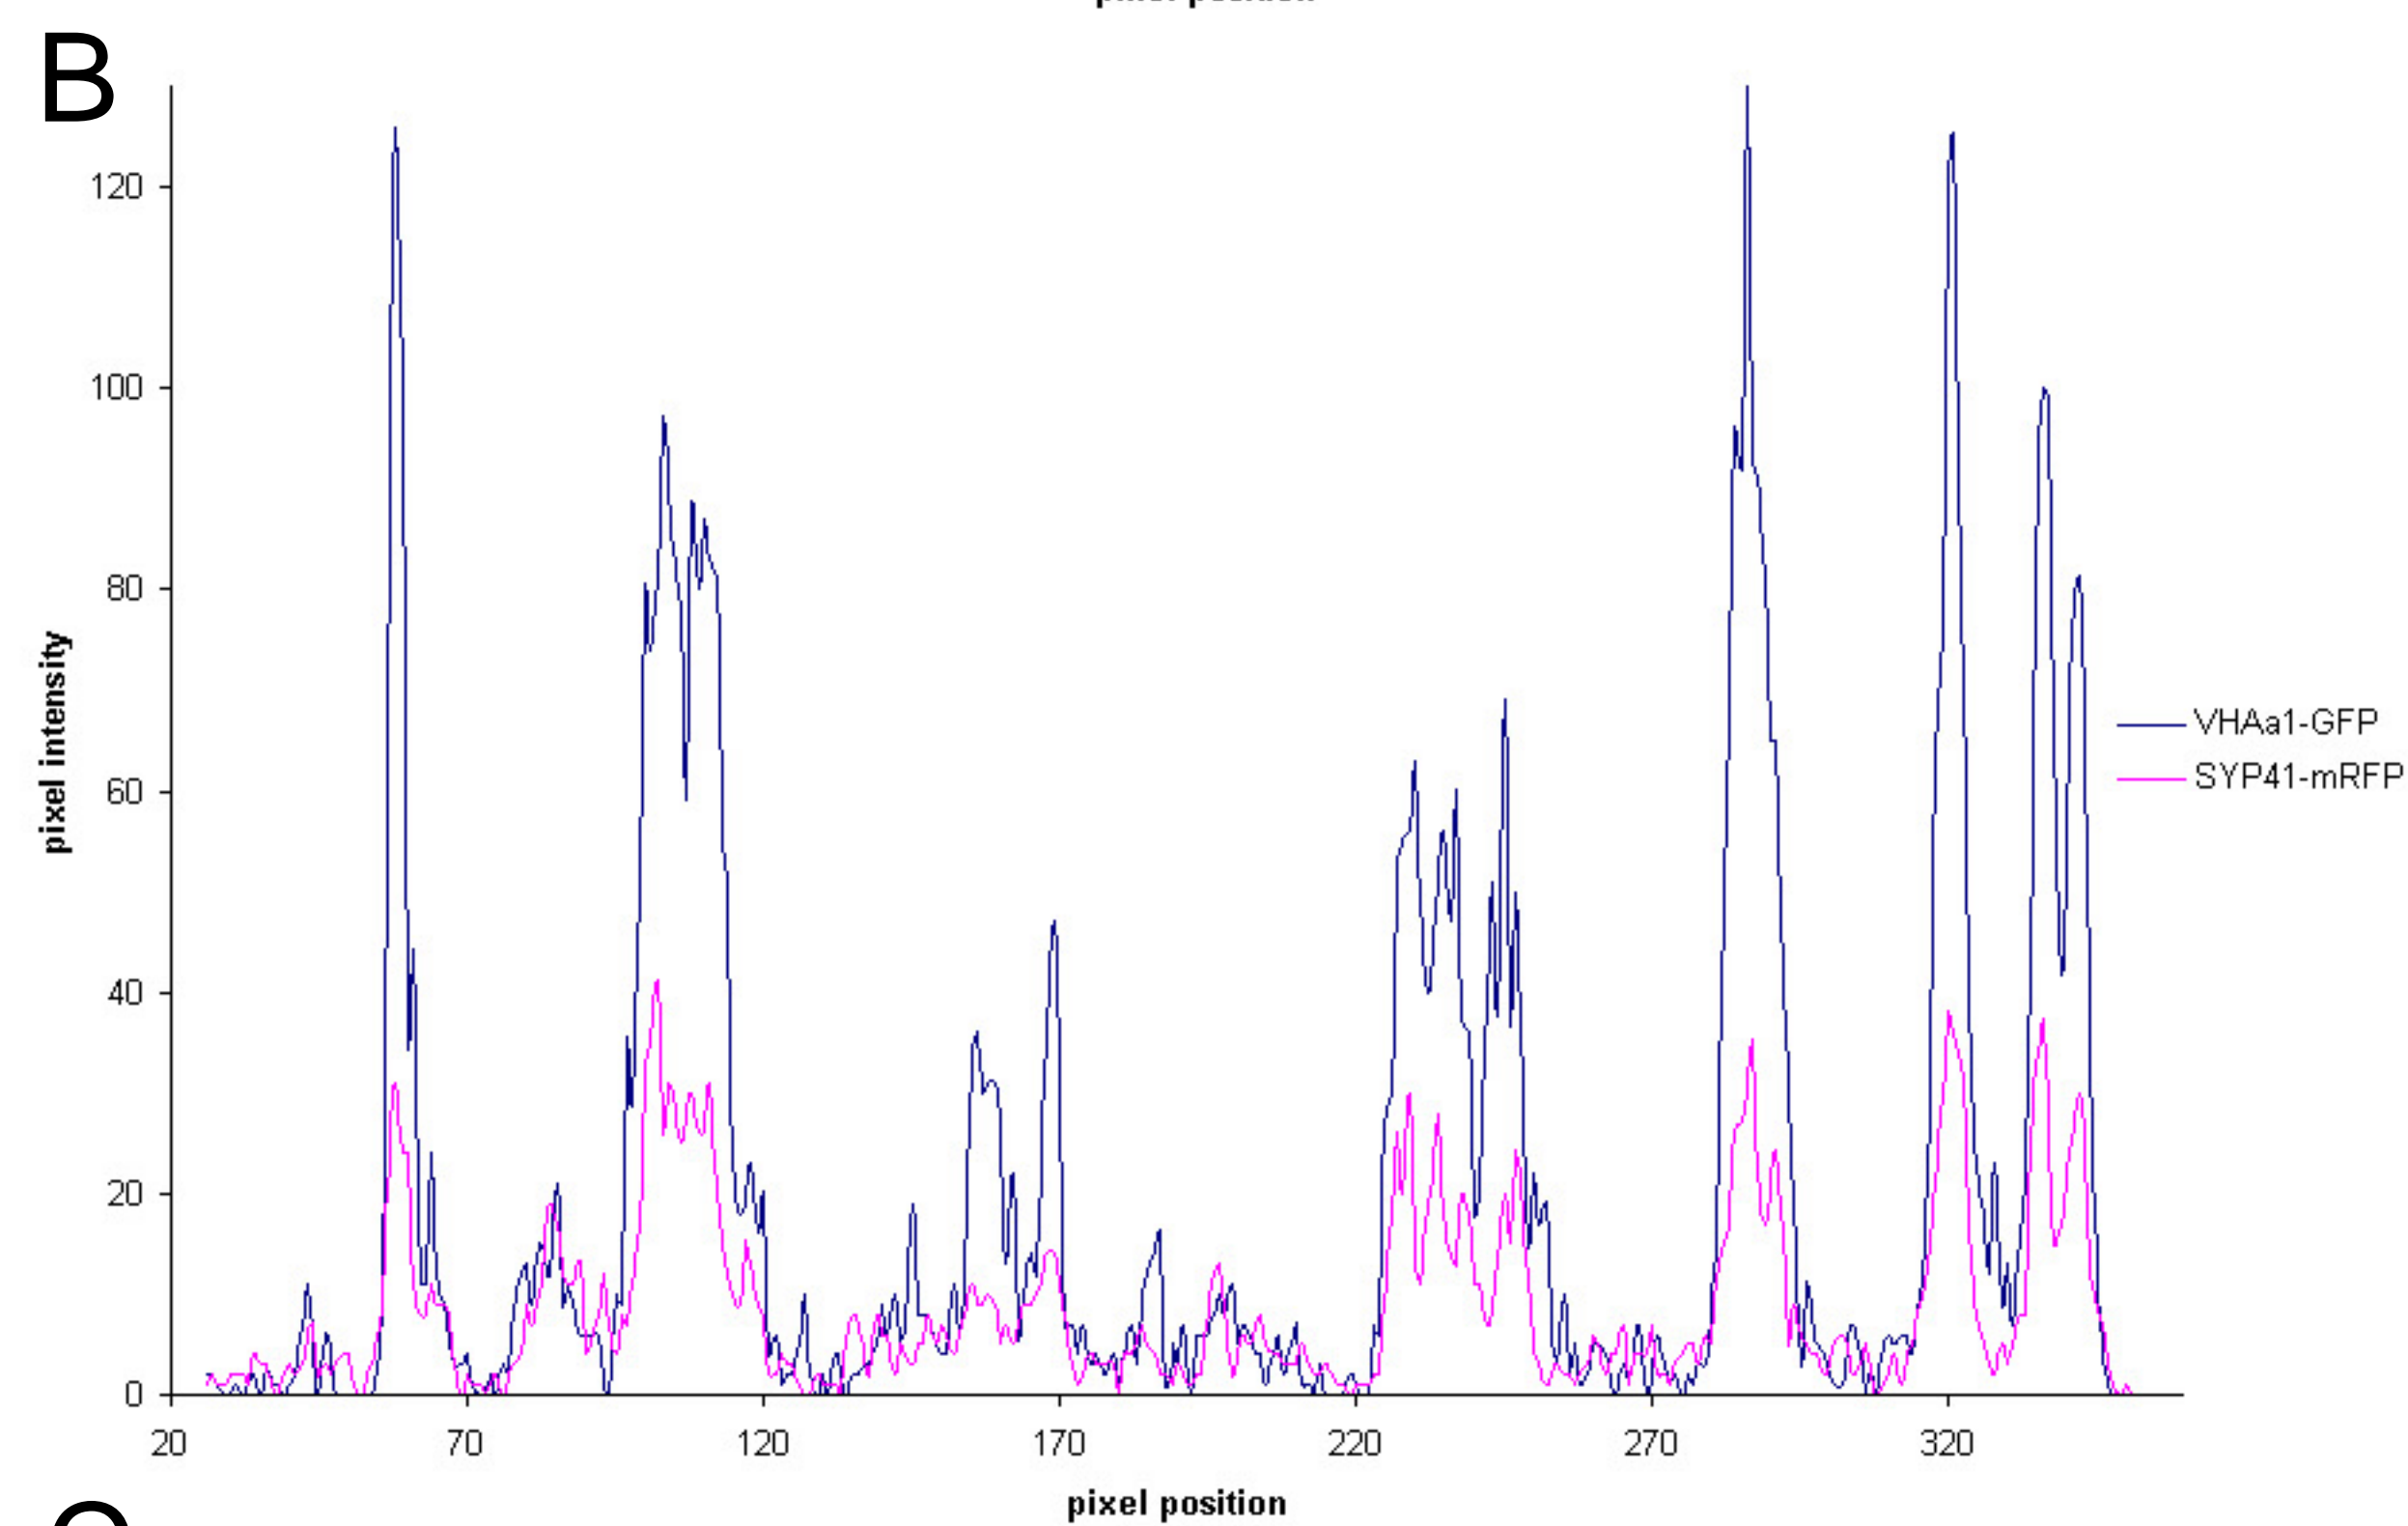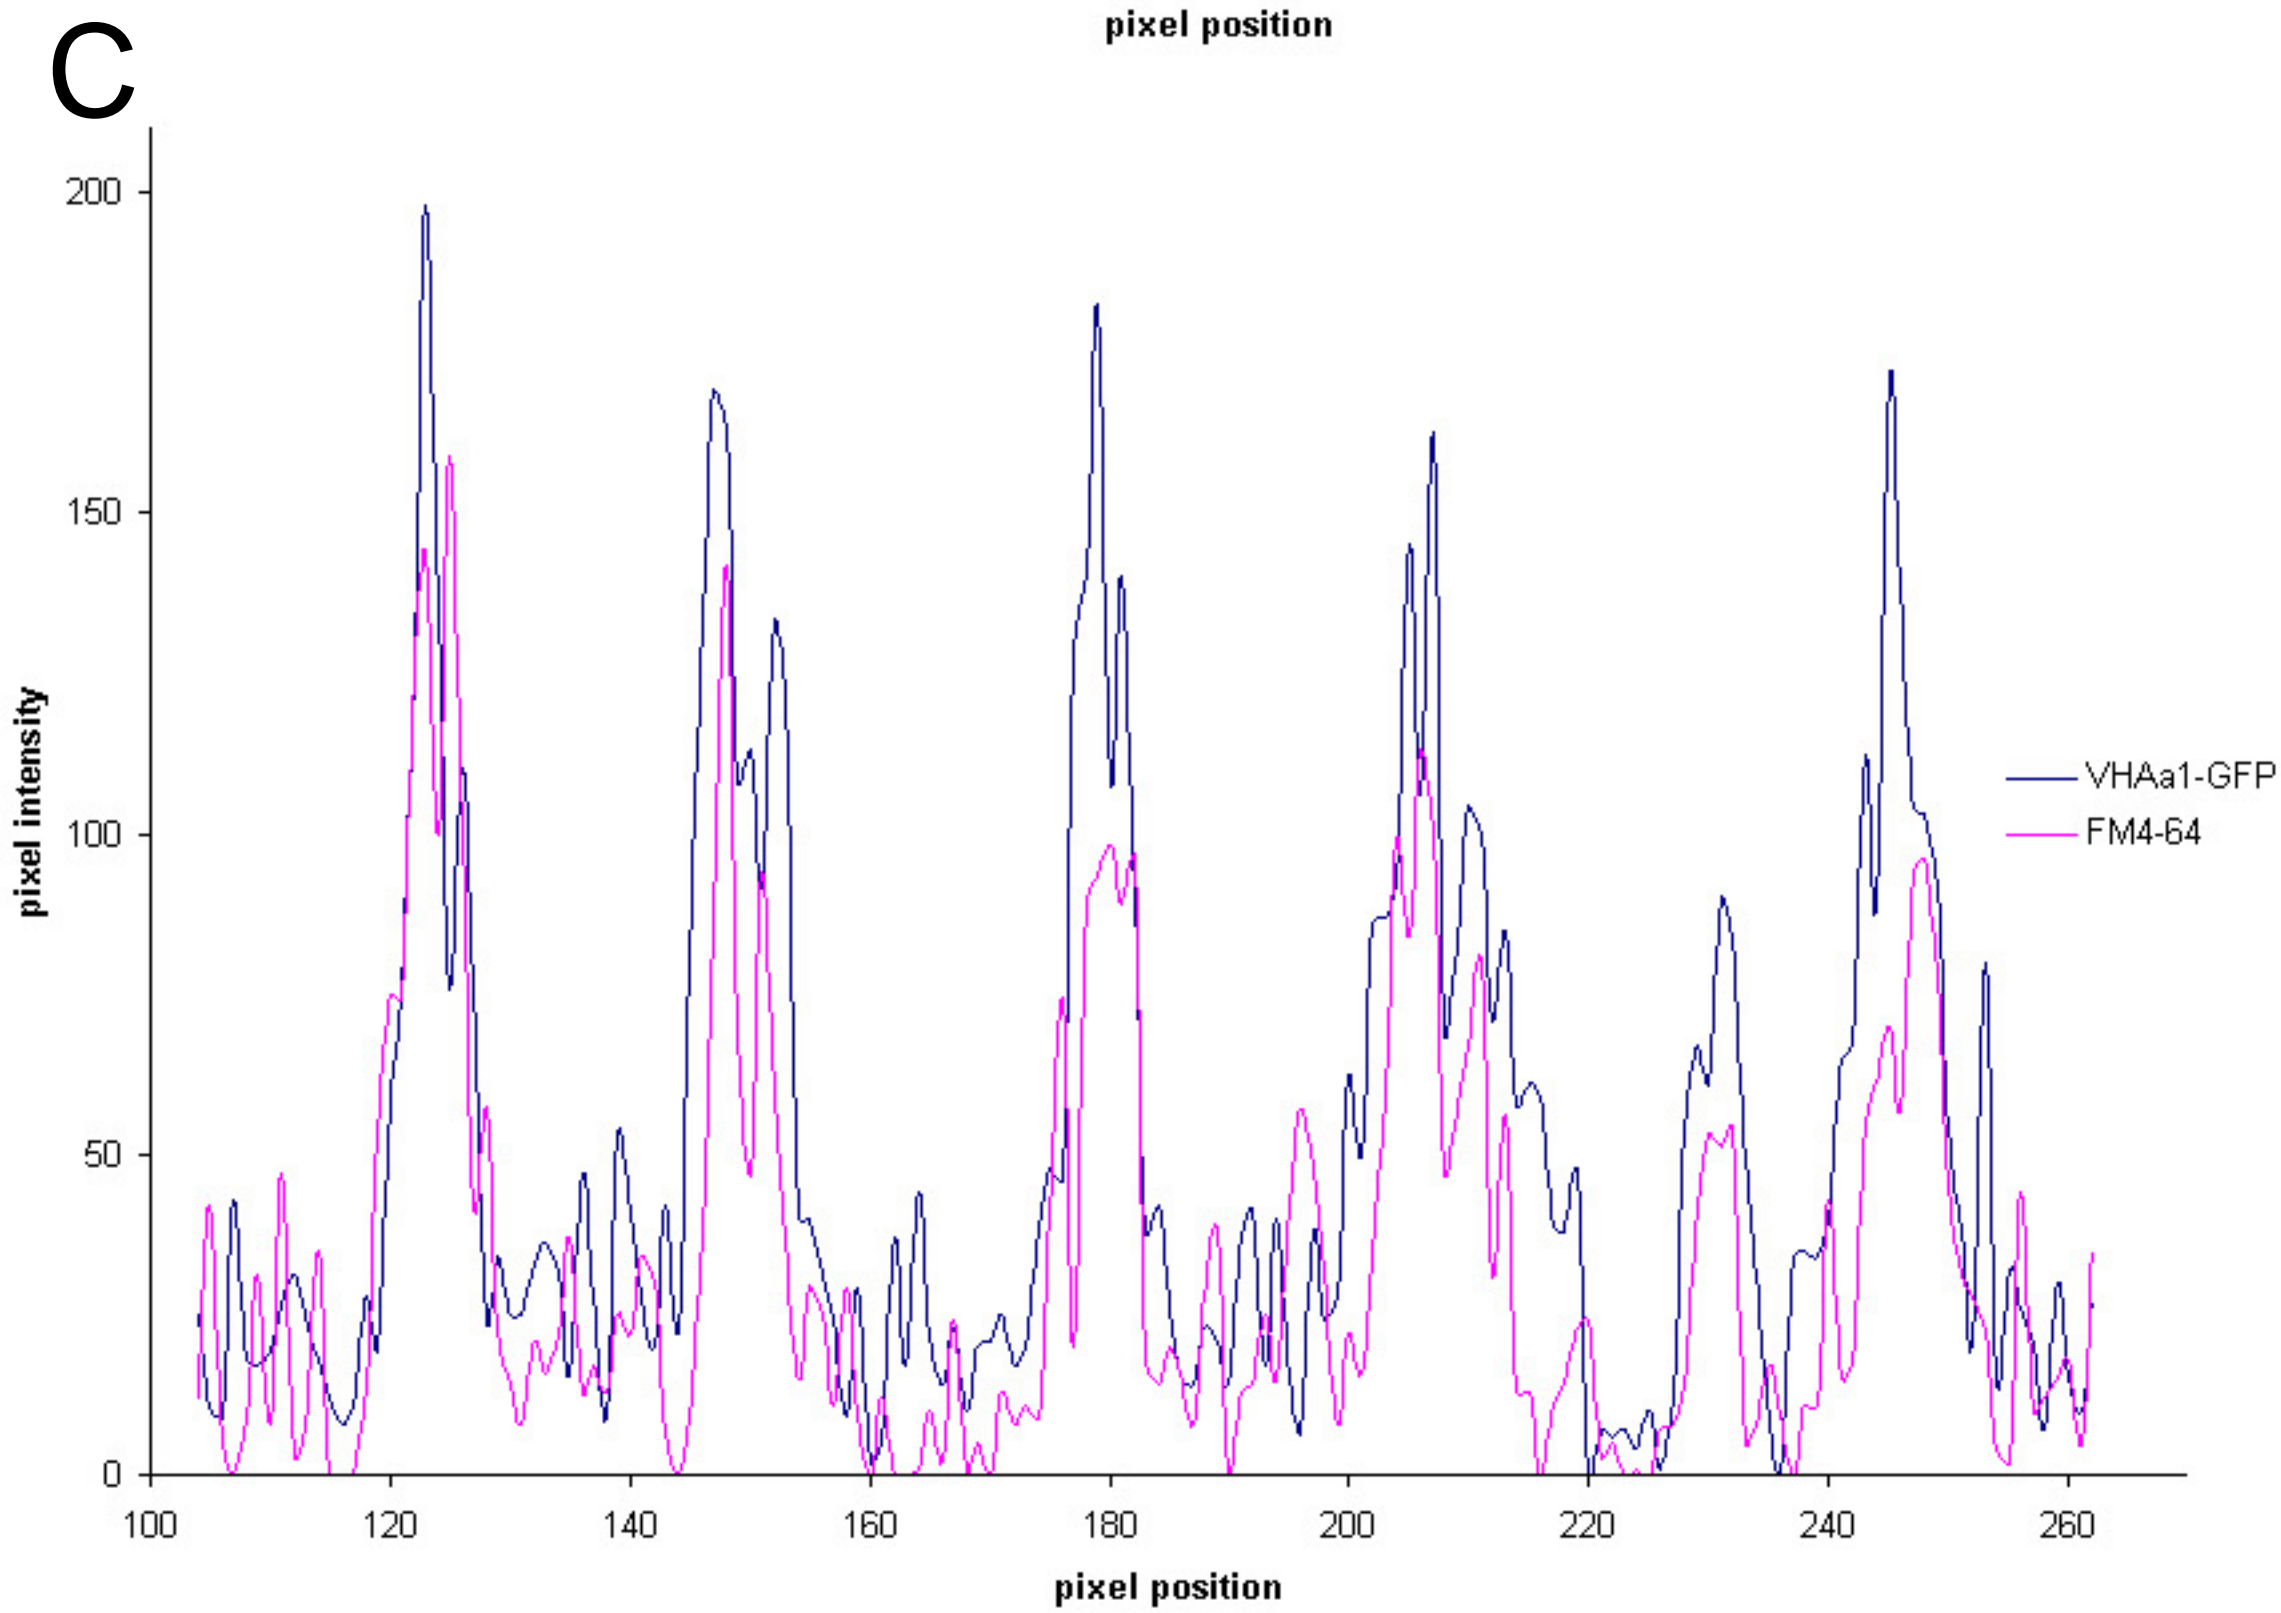

Supplement: plntcell_tpc.105.037978_4.pdf [file plntcell_tpc.105.037978_4.pdf]

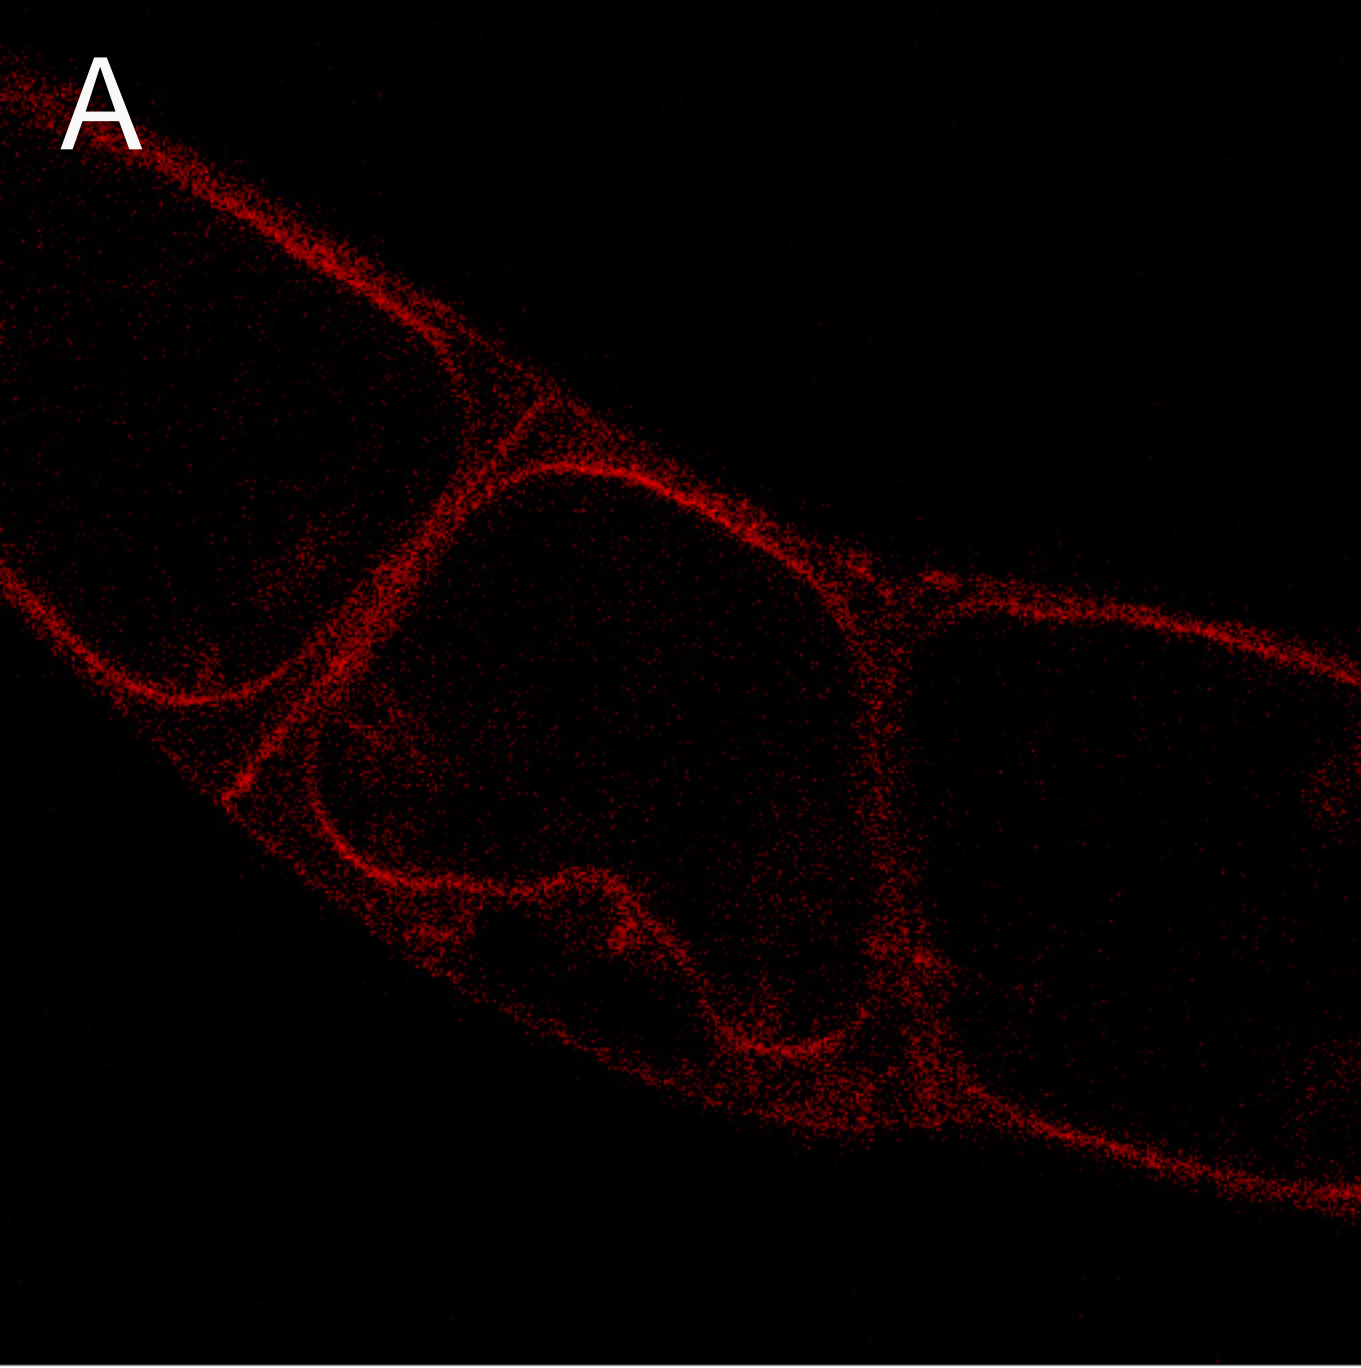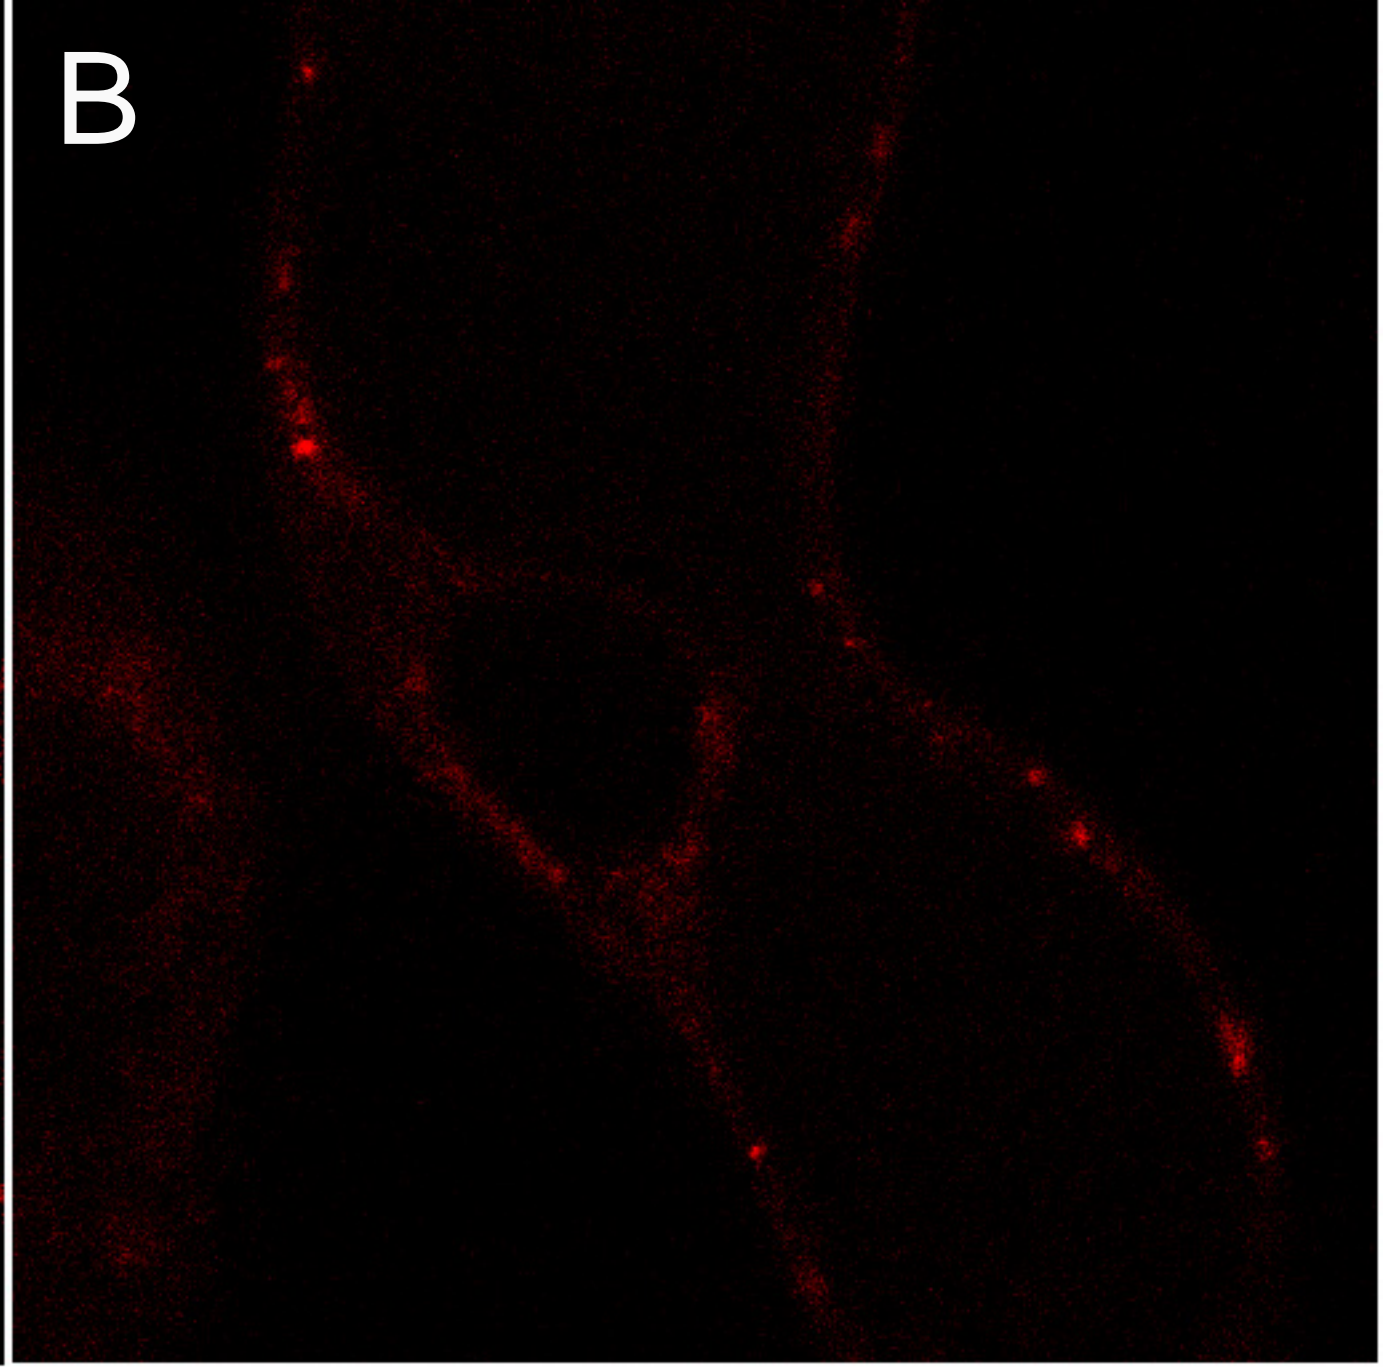

Supplement: plntcell_tpc.105.037978_5.pdf [file plntcell_tpc.105.037978_5.pdf]
